# Supplementary material
Source: PubMed Central journal article supplement (PMC3262680)

Supplemental Figure 1

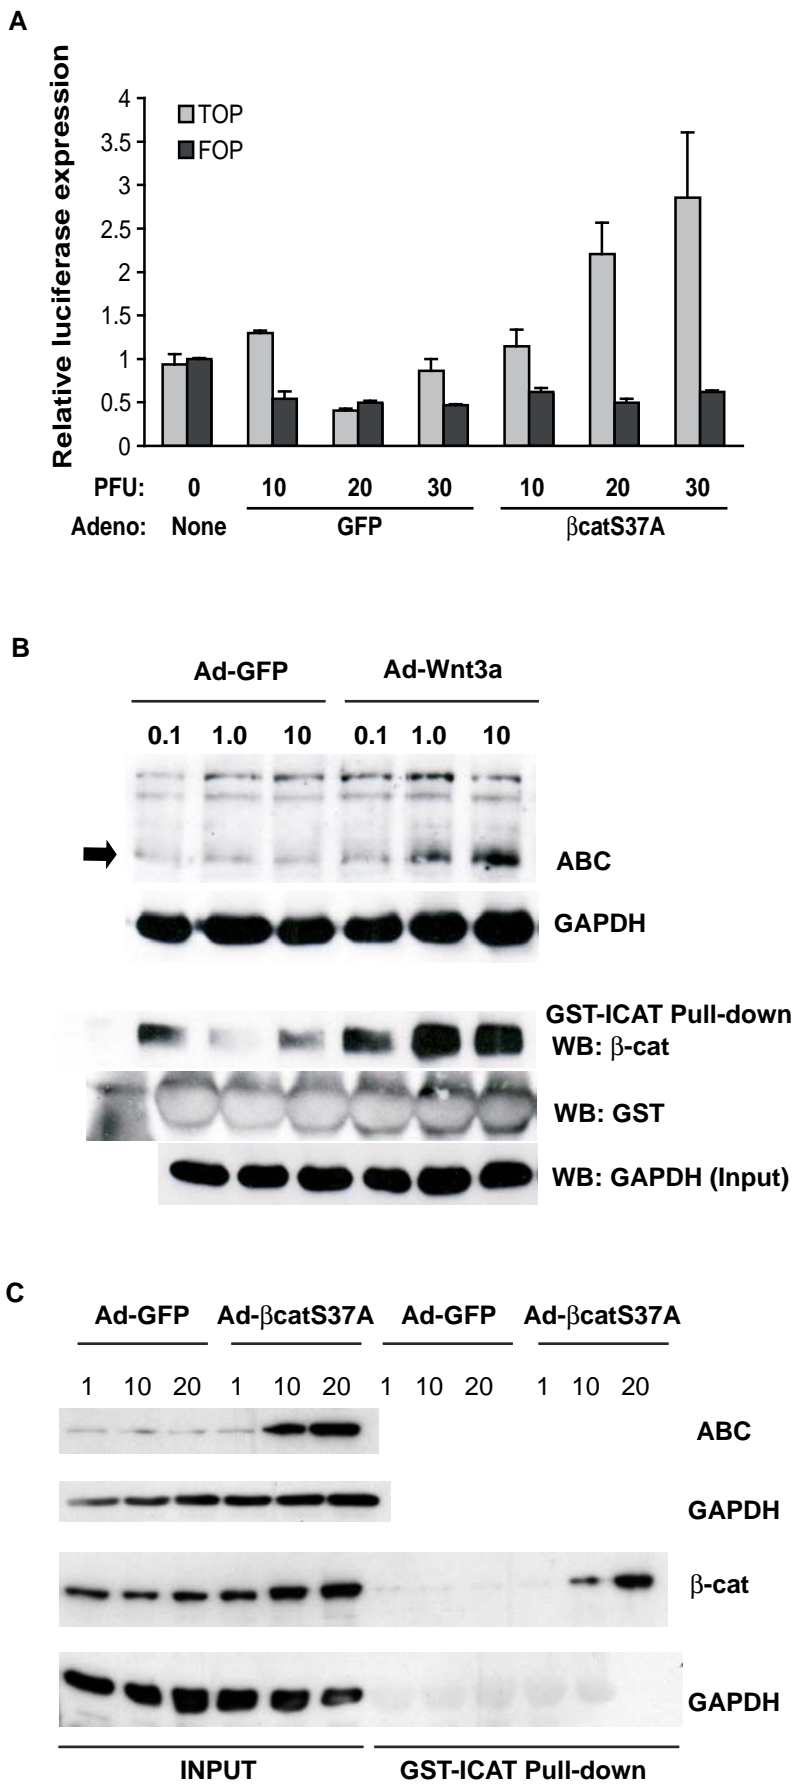

Supplemental Figure 2

A

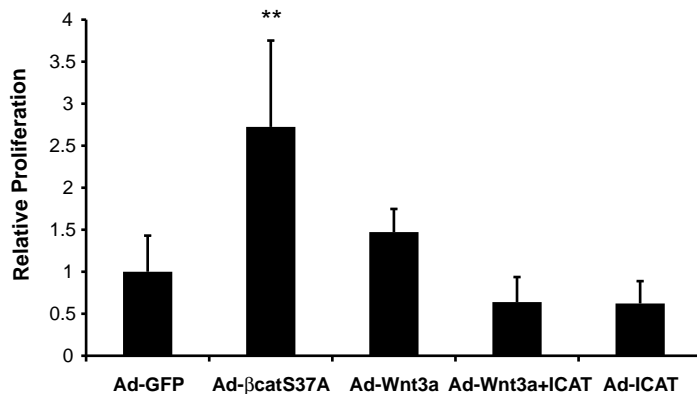

B

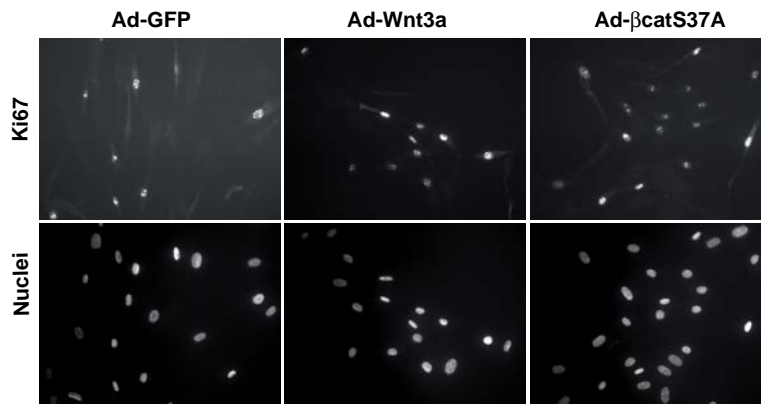

C

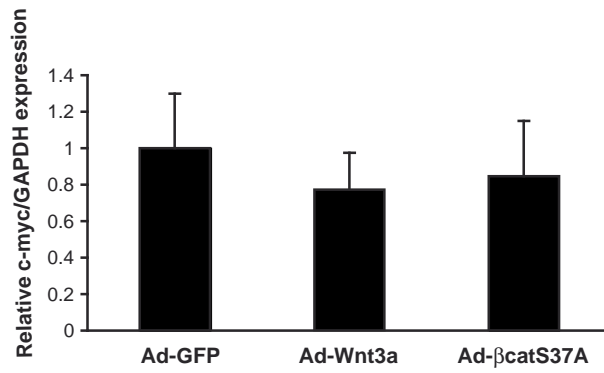

D

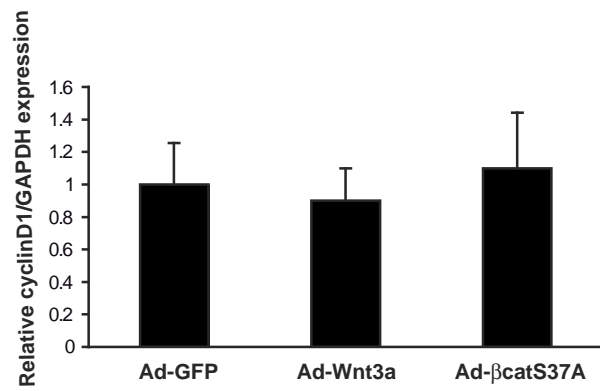

Supplemental Figure 3

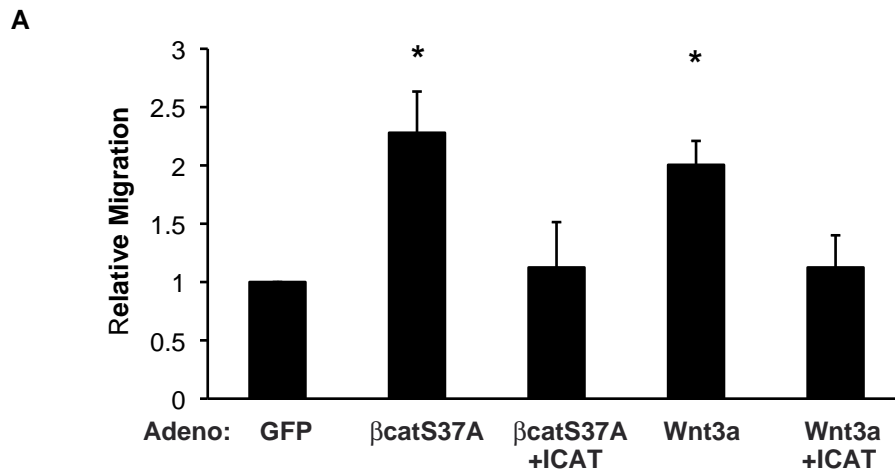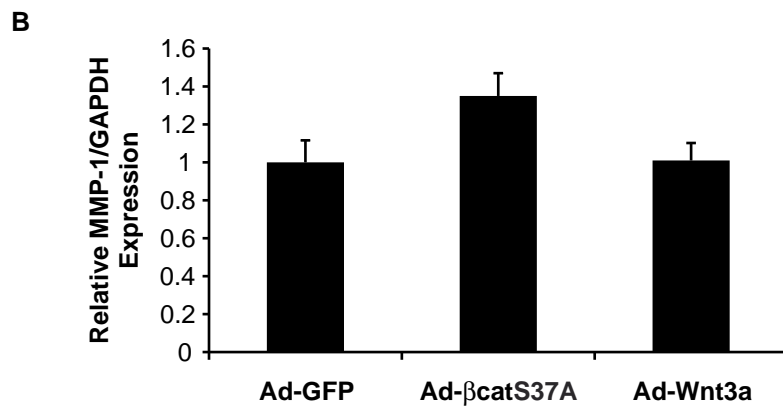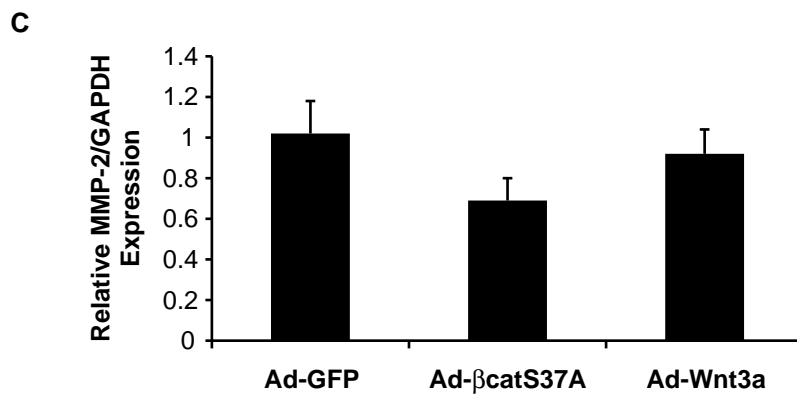

**A**

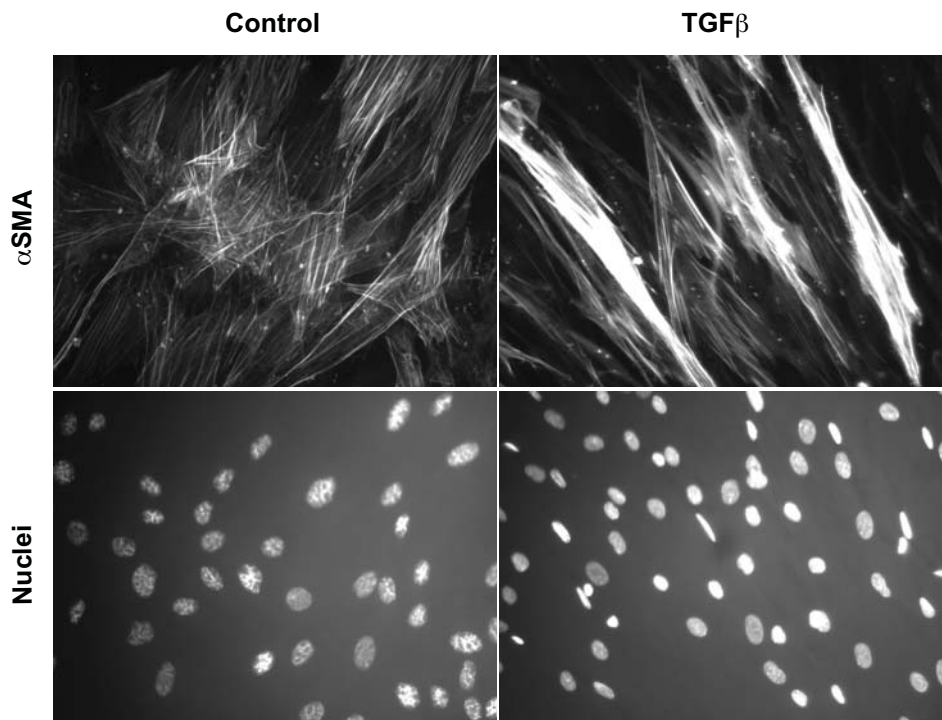

**B**

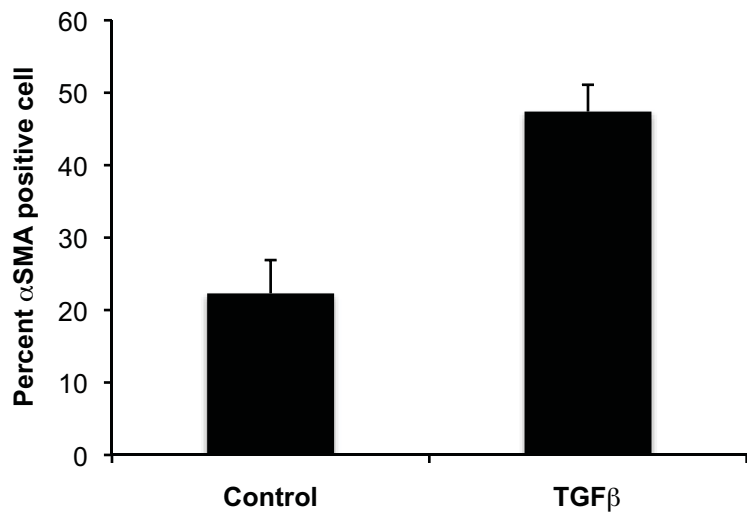

Supplement: supp_45.5.915_Lam_ODS_Supp_figs_1_-_4.pdf [file supp_45.5.915_Lam_ODS_Supp_figs_1_-_4.pdf]
